# Supplementary material for: Pyrogallol-Phloroglucinol-6,6’-Bieckol from Ecklonia cava Improved Blood Circulation in Diet-Induced Obese and Diet-Induced Hypertension Mouse Models
Source: PubMed Central journal article supplement (PMC6562948; doi:10.3390/md17050272), 2019-05-08
Supplement: marinedrugs-17-00272-s001.pdf [file marinedrugs-17-00272-s001.pdf]

## Supplementary material

**Table S1. List of antibodies for Immunohistochemistry, Immunofluorescence and immunoblotting (Western blot)**

| Antibody name | Company    | Cat. No. | Immunofluorescence |
|---------------|------------|----------|--------------------|
| ICAM-1        | Invitrogen | MA5407   | 1:250              |
| VCAM-1        | Abcam      | Ab134047 | 1:250              |
| E-selectin    | Santa cruz | Sc-7884  | 1:50               |
| vWF           | DAKO       | A0082    | 1:250              |

  

| Antibody name        | Company        | Cat. No.  | Western blot /<br>Immunohistochemistry |
|----------------------|----------------|-----------|----------------------------------------|
| PCNA                 | Abcam          | Ab2426    | - / 1:250                              |
| Phospho-ERK (pERK)   | Cell signaling | 9101s     | - / 1:100                              |
| Phospho-AKT (pAKT)   | Santa cruz     | Sc-514032 | - / 1:50                               |
| Phospho-AMPK (pAMPK) | Abcam          | Ab133448  | - / 1:100                              |
| PI3K                 | Fine Test      | FNab06422 | - / 1:100                              |

**Table S2. List of primer for quantitative real time polymerase chain reaction (qRT-PCR)**

| Gene name         |         | Primer sequence               |
|-------------------|---------|-------------------------------|
| <i>β-actin</i>    | Forward | 5'-ACAAAGCTGTTTCAGTGTCTCCA-3' |
|                   | Reverse | 5'-CTCCGTTTCCAGAATACACACA-3'  |
| <i>E-selectin</i> | Forward | 5'-ATGAAATGTCTTCCCAGTGCTT-3'  |
|                   | Reverse | 5'-TGATCCCTTCAGTTCAAATCCT-3'  |
| <i>ICAM-1</i>     | Forward | 5'-ATAACCGCCAGAGAAAGATCAG-3'  |
|                   | Reverse | 5'-GGCTTGTCCTTGAGTTTTATG-3'   |
| <i>VCAM-1</i>     | Forward | 5'-GAGACCTGTCACTGTCAACTGC-3'  |
|                   | Reverse | 5'-CATCAGTGTAGTCTCCCCCTTC-3'  |
| <i>vWF</i>        | Forward | 5'-GGCAAAGCATTGTATGACTC -3'   |
|                   | Reverse | 5'-ATTTGTCGGTTGTCTTTCCTGT-3'  |
